# Supplementary material
Source: PubMed Central journal article supplement (PMC2270306)

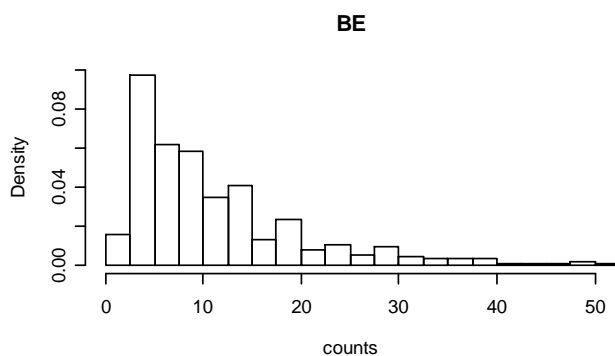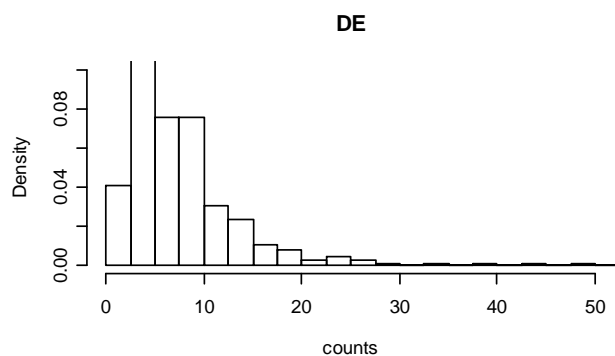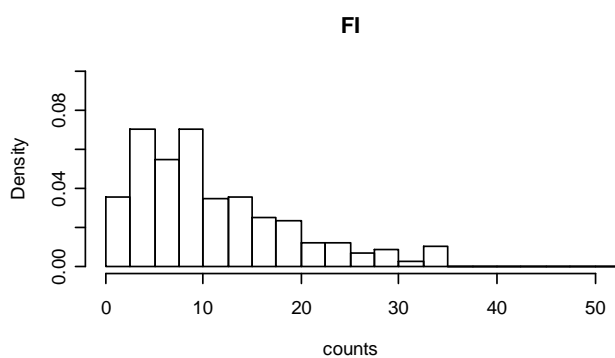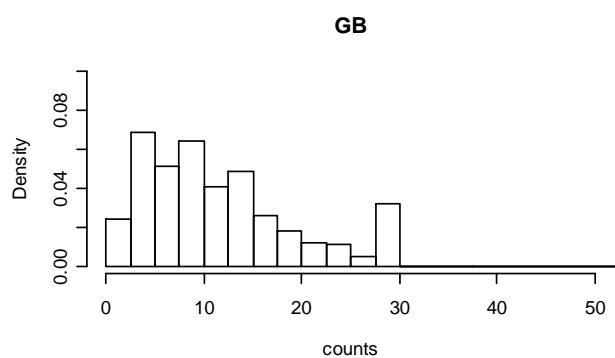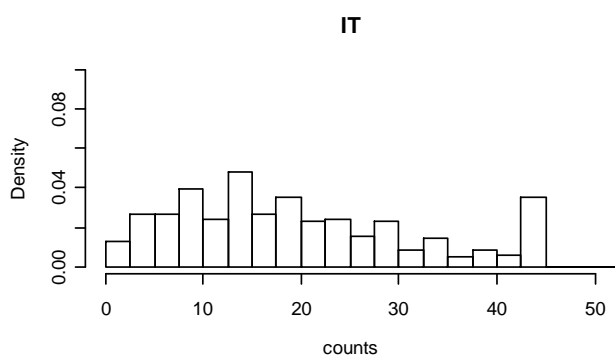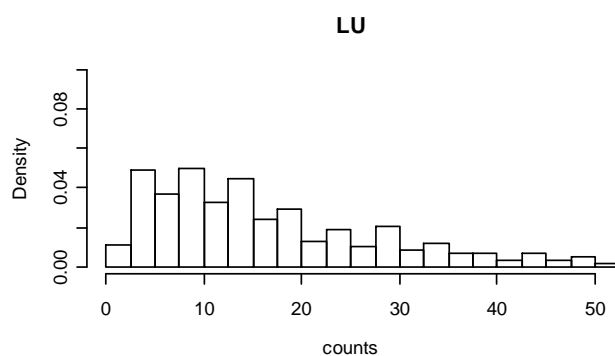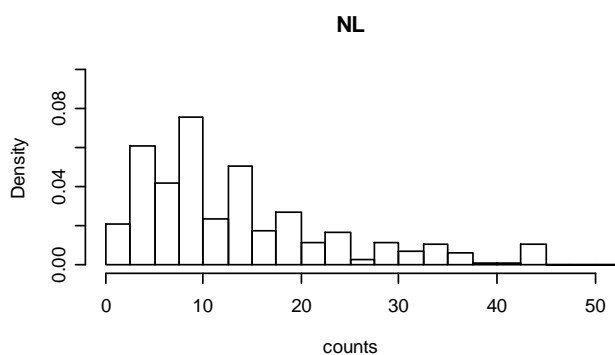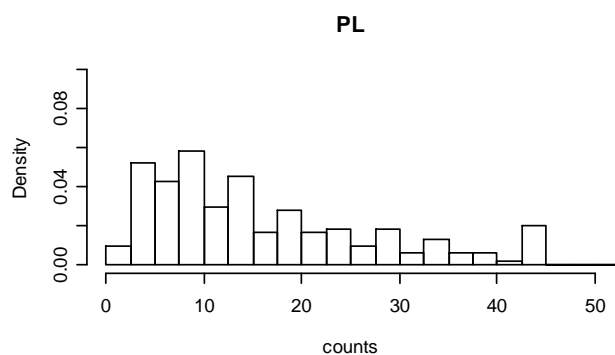

Supplement: pmed.0050074.sg001.pdf [file pmed.0050074.sg001.pdf]

**BE**

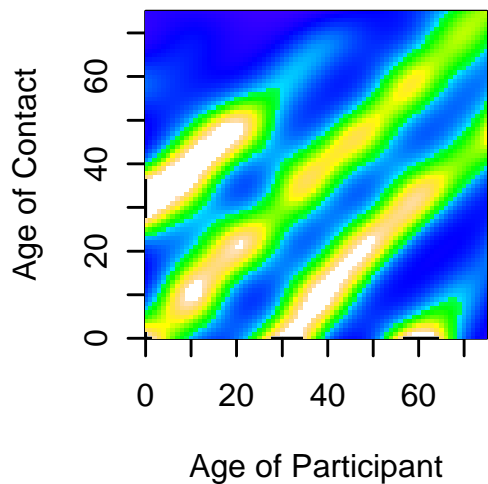

**DE**

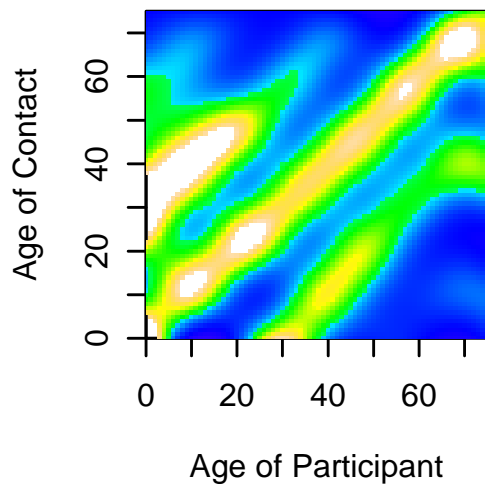

**FI**

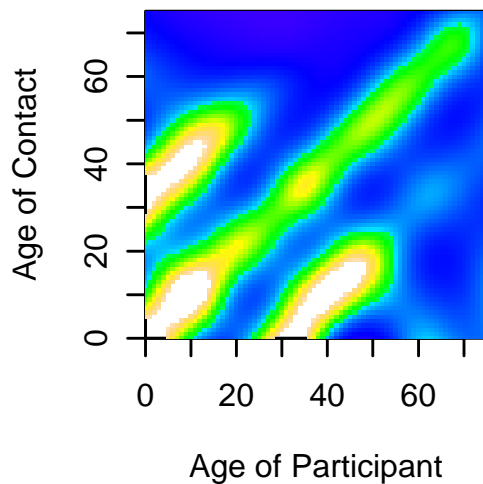

**GB**

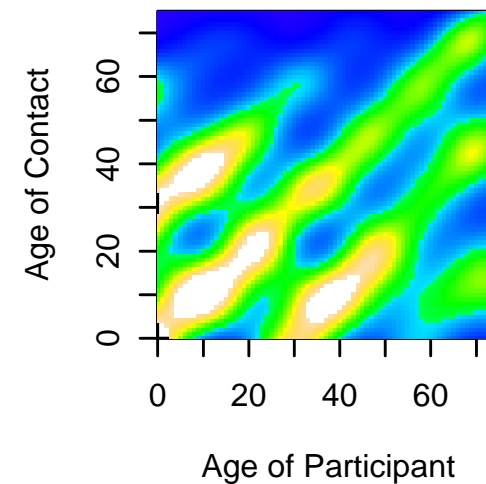

**IT**

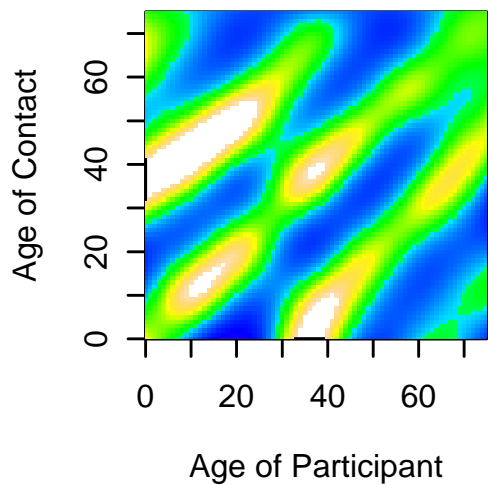

**LU**

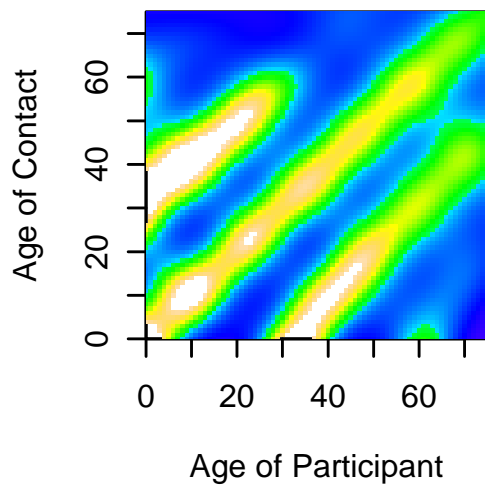

**NL**

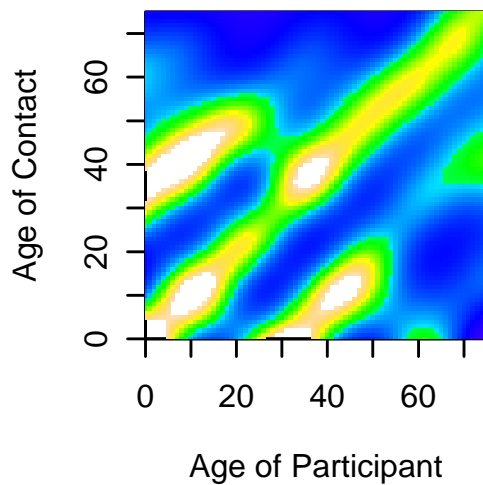

**PL**

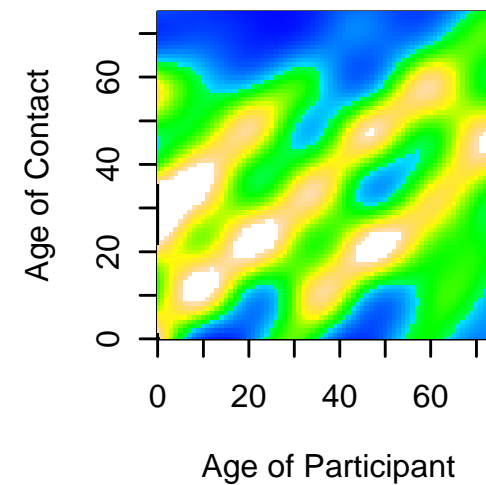

Supplement: pmed.0050074.sg003.pdf [file pmed.0050074.sg003.pdf]

**BE**

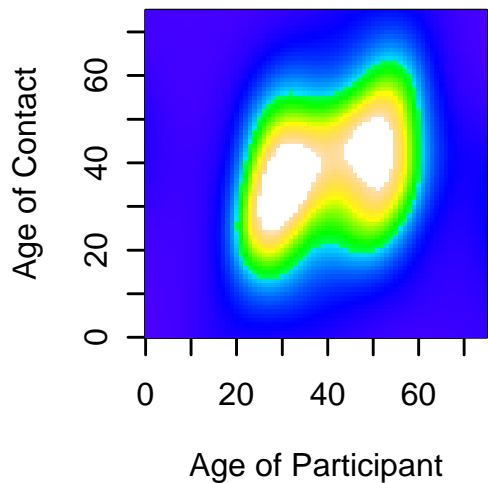

**DE**

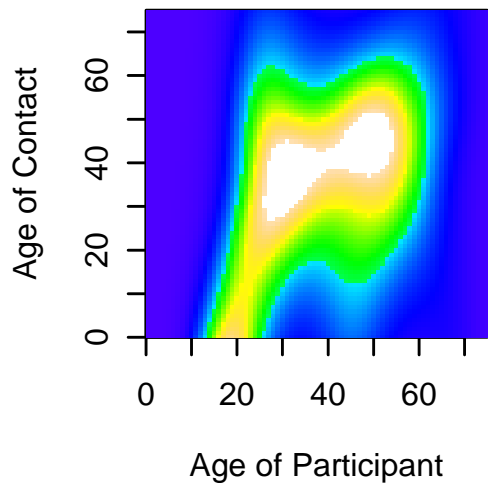

**FI**

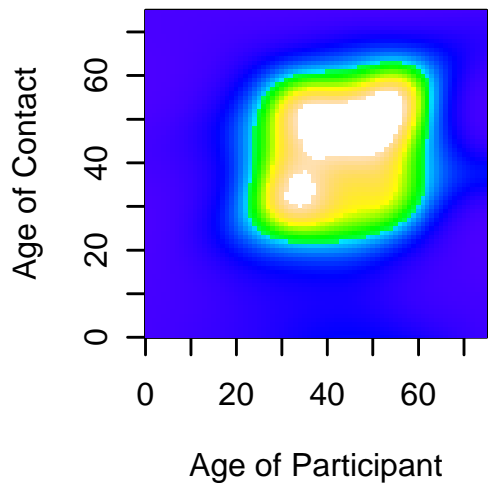

**GB**

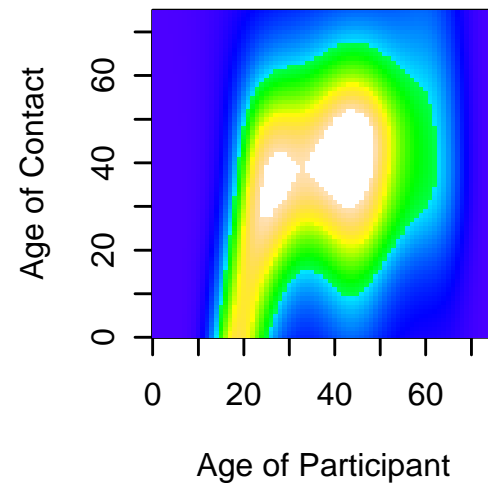

**IT**

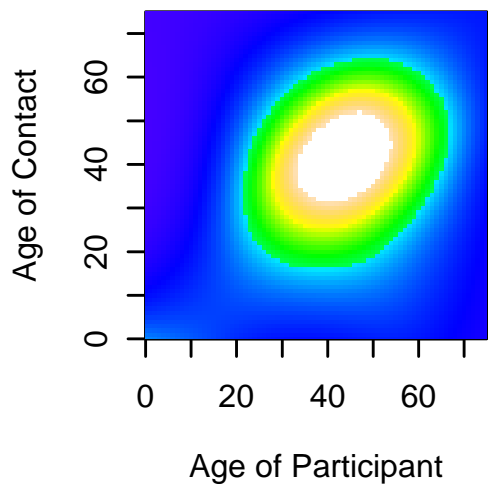

**LU**

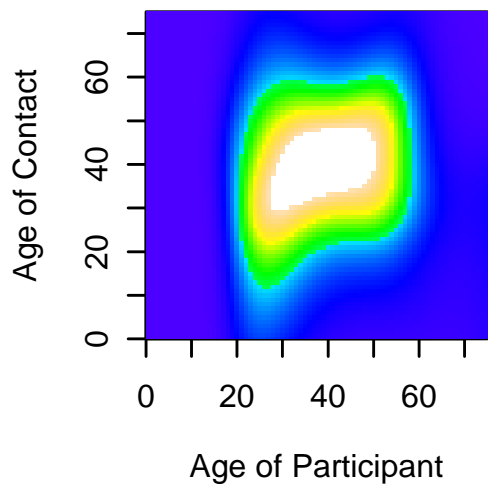

**NL**

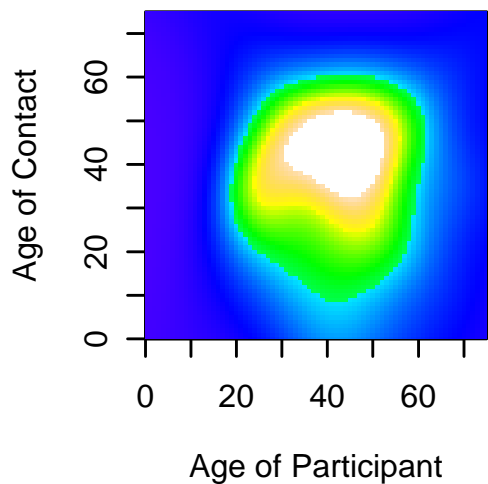

**PL**

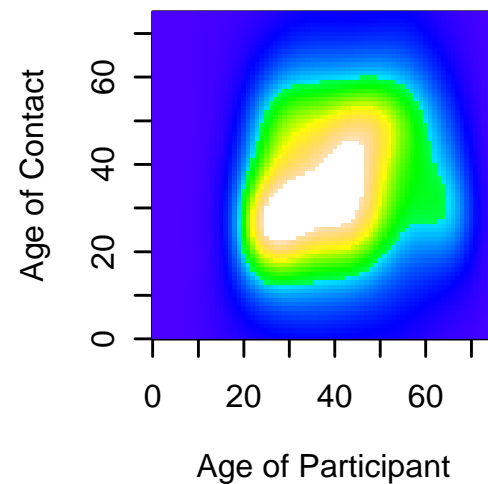

Supplement: pmed.0050074.sg004.pdf [file pmed.0050074.sg004.pdf]
